# Supplementary material for: Endoscopic liquid biopsies of gastric fluid in a large human patient cohort reveal DNA content as a candidate tumor biomarker in gastric cancer
Source: eLife. 2025 Dec 16;14:RP107103. doi: 10.7554/eLife.107103 (PMC12707811; doi:10.7554/eLife.107103)
Supplement: Supplementary file 1. [file elife-107103-supp1.xlsx]

## Sheet: Sheet1
Supplementary file 1 - Analysis of CT values for bacteria and human target genes
	CT 16S-V1	N	Median CT	p
	Normal	10	17.27	0.21
	Peptic diseases	51	18.6
	Preneoplastic conditions	55	17.72
	Cancer	64	18.92
	CT human Beta-ACT	N	Median CT	p
	Normal	10	25.29	0.07
	Peptic diseases	51	26.21
	Preneoplastic conditions	55	27.01
	Cancer	64	27.46
