# Supplementary material for: Endoscopic liquid biopsies of gastric fluid in a large human patient cohort reveal DNA content as a candidate tumor biomarker in gastric cancer
Source: eLife. 2025 Dec 16;14:RP107103. doi: 10.7554/eLife.107103 (PMC12707811; doi:10.7554/eLife.107103)
Supplement: Supplementary file 2. [file elife-107103-supp2.xlsx]

## Sheet: Sheet1
		Supplementary file 2 – Performance metrics of the ROC/AUC curves shown in Figure 3.
		Cancer vs. non-cancer thresholds				Cancer + pre-neoplastic lesions vs. normal + peptic diseases (Ref. Figure 3B)
		(Ref. Figure 3A)
		Threshold	Specificity	Sensitivity	Youden_J	Threshold	Specificity	Sensitivity	Youden_J
		11.81	0.7532	0.5085	0.2617	10.75	0.7343	0.4716	0.206
		11.75	0.7489	0.5127	0.2616	11.55	0.7508	0.4537	0.2046
		11.65	0.7475	0.5127	0.2602	10.65	0.731	0.4716	0.2027
		10.75	0.7262	0.5339	0.2601	11.65	0.7541	0.4478	0.2019
		11.86	0.7532	0.5042	0.2574	10.9	0.736	0.4657	0.2016
		10.65	0.7234	0.5339	0.2573	11.485	0.7475	0.4537	0.2013
		10.55	0.722	0.5339	0.2559	10.55	0.7294	0.4716	0.201
		11.55	0.7418	0.5127	0.2546	11.81	0.7591	0.4418	0.2009
		10.455	0.7163	0.5381	0.2544	11.465	0.7459	0.4537	0.1996
		10.9	0.7277	0.5254	0.2531	11.75	0.7541	0.4448	0.1989
