# Supplementary material for: Endoscopic liquid biopsies of gastric fluid in a large human patient cohort reveal DNA content as a candidate tumor biomarker in gastric cancer
Source: eLife. 2025 Dec 16;14:RP107103. doi: 10.7554/eLife.107103 (PMC12707811; doi:10.7554/eLife.107103)
Supplement: Supplementary file 3. [file elife-107103-supp3.xlsx]

## Sheet: Sheet1
	Supplementary file 3 – gfDNA concentration and intensity of inflammatory cell infiltrates
	Inflammatory	Lower gfDNA	Higher gfDNA
	infiltrates	(<1.28ng/µL)	(>1.28ng/µL)
		N=8 patients	N=24 patients
	Minimal/rare	0	8.3% (n=2)
	Minimal/rare to moderate	62.5% (n=5)	12.5% (n=3)
	Moderate	37.5% (n=3)	12.5% (n=3)
	Moderate to intense/elevated	0	50% (n=12)
	Intense/elevated	0	16.6% (n=4)
